# Supplementary material for: In situfabrication of a rose-shaped Co2P2O7/C nanohybridviaa coordination polymer template for supercapacitor application
Source: Royal Society of Chemistry journal article supplement (doi:10.1039/d0nj02414g), 2020-01-01
Supplement: d0nj02414g1.pdf [file d0nj02414g1.pdf]

## Supporting Information

### **In-situ fabrication of rose-shaped Co<sub>2</sub>P<sub>2</sub>O<sub>7</sub>/C nanohybrid via coordination polymer template for supercapacitor application**

*Jiaxin Zhang, Peng Liu, Ranran Bu., Hao Zhang, Qi Zhang\*, Kang Liu, Yanru Liu, Zhenyu Xiao\*,  
Lei Wang*

Key Laboratory of Ecochemical Engineering, Taishan Scholar Advantage and Characteristic Discipline Team of Ecochemical Process and Technology, College of Chemistry and Molecular Engineering, Qingdao University of Science and Technology, Qingdao 266042, P. R. China.

**Containing: 9 pages, 12 Figures, 5 equations and 1 Table**

**Figure S1.** The PXRD patterns of Co(PhPO<sub>3</sub>) and [Co(PhPO<sub>3</sub>)(H<sub>2</sub>O)]<sub>n</sub>.

**Figure S2.** The P 2p spectra (a), C 1s spectra (b) and O 1s spectra (c) of Co<sub>2</sub>P<sub>2</sub>O<sub>7</sub>/C-900.

**Figure S3.** The SEM images of (a,b) Co(PhPO<sub>3</sub>) and (c) Co<sub>2</sub>P<sub>2</sub>O<sub>7</sub>-900.

**Figure S4.** The SEM images (a,b) and TEM image (c) of Co<sub>2</sub>P<sub>2</sub>O<sub>7</sub>/C-900.

**Figure S5.** The N<sub>2</sub> adsorption and desorption isotherms and pore size distribution curve of Co<sub>2</sub>P<sub>2</sub>O<sub>7</sub>/C-900.

**Figure S6.** (a) The Thermogravimetric analysis of Co(PhPO<sub>3</sub>) precursor. (b) The PXRD patterns of Co<sub>2</sub>P<sub>2</sub>O<sub>7</sub>/C-600, Co<sub>2</sub>P<sub>2</sub>O<sub>7</sub>/C-700, Co<sub>2</sub>P<sub>2</sub>O<sub>7</sub>/C-800, Co<sub>2</sub>P<sub>2</sub>O<sub>7</sub>/C-900 and Co<sub>2</sub>P<sub>2</sub>O<sub>7</sub>/C-1000.

**Figure S7.** The CV curves (a), (b), (c) and GCD curves (d), (e), (f) of the Co(PhPO<sub>3</sub>), Co<sub>2</sub>P<sub>2</sub>O<sub>7</sub>-900 and Co<sub>2</sub>P<sub>2</sub>O<sub>7</sub>/C-900.

**Figure S8.** The electrochemical performance of Ni foam: (a) the CV curves (b) the GCD curves.

**Figure S9.** The CV curves of the Co<sub>2</sub>P<sub>2</sub>O<sub>7</sub>/C-600 (a), -700 (b), -800 (c) and -1000 (d) within the potential of 0-0.5 V (vs. Hg/HgO) at various scan rates.

**Figure S10.** The GCD curves of the Co<sub>2</sub>P<sub>2</sub>O<sub>7</sub>/C-600 (a), -700 (b), -800 (c) and -1000 (d) at various current densities.

**Figure S11.** The specific capacitance (a) and the Nyquist plots (b) of Co<sub>2</sub>P<sub>2</sub>O<sub>7</sub>/C-X and Co(PhPO<sub>3</sub>).

**Figure S12.** The CV (a) and GCD (b) curves of the 3DPG anode.

## 1. Electrochemical measurements

The electrochemical behaviors are carried out by a CHI 760E electrochemical station in 6 M KOH. In the three-electrode system, we use a platinum wire (0.5 cm × 37 mm) as the counter electrode and a Hg/HgO electrode as the reference electrode. For the working electrode, we prepare a homogeneous slurry, containing 80 % active materials, 10 % carbon black, and 10 % polytetra-fluorethylene (PTFE) in ethanol. After drying at 70 °C for 12 h, weighing about 2.5 mg of the solidified mixture and then pressed between two pieces of nickel foam (1 cm × 2 cm) under 1.0 MPa.

An all-solid-state hybrid supercapacitor is assembled by using active materials (Co<sub>2</sub>P<sub>2</sub>O<sub>7</sub>/C-900) as the positive electrode, 3DPG as the negative electrode, and PVA/KOH hydrogel polymer as the electrolyte. The negative electrode contains 3D porous graphene, carbon black and PTFE with a weight ratio of 8:1:1. The PVA/KOH gel electrolyte is synthesized by a common way: 1 g PVA is added into 40 mL of H<sub>2</sub>O with heating and stirring to form a clear solution; then 6 g of KOH is added into the solution and dried in the air to obtain the PVA/KOH gel electrolyte.

## 2. Characterization:

All chemicals are analytical grade and were used without any purification. Powder X-ray diffraction patterns of the prepared samples are collected on a Rigaku D-MAX2500/PC advance instrument with Cu-K $\alpha$  radiation ( $\lambda = 1.5418 \text{ \AA}$ ). The XPS spectrum of Co<sub>2</sub>P<sub>2</sub>O<sub>7</sub>/C-900 is measured by Thermo Scientific 250xl. The morphology and structure of the prepared samples are examined by electron microscopy (SEM, Zeiss merlin; TEM, FEI Tecnai G<sup>2</sup> F20). The Thermogravimetric analysis (TGA) is recorded by TA STA Q600 (U.S.A.) in N<sub>2</sub>. The Raman spectra are recorded on a LabRRM HR Evolution instrument with the excitation light (Ar<sup>+</sup> laser, 633 nm). The N<sub>2</sub> adsorption–desorption isotherms at 77 K is tested by a Quantachrome instruments version 4.01.

### 3. Characterization

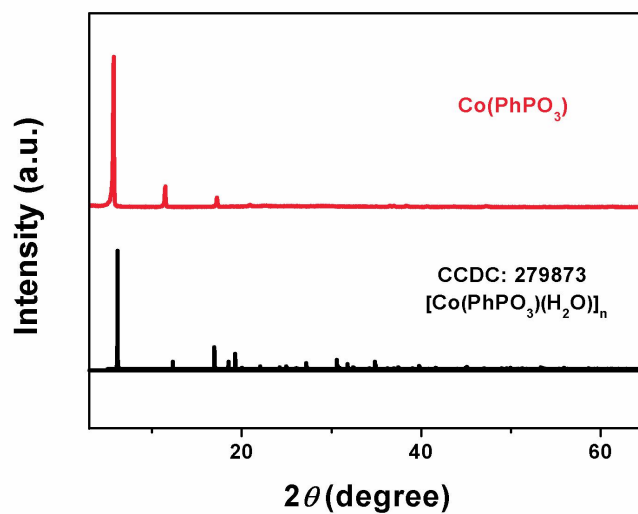

**Figure S1.** The PXRD patterns of  $\text{Co(PhPO}_3\text{)}$  and  $[\text{Co(PhPO}_3\text{)(H}_2\text{O)}]_n$ .

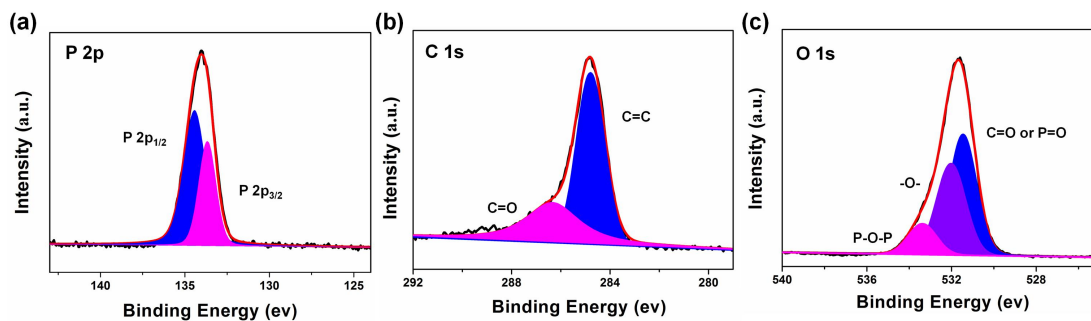

**Figure S2.** The P 2p spectra (a), C 1s spectra (b) and O 1s spectra (c) of  $\text{Co}_2\text{P}_2\text{O}_7/\text{C-900}$ .

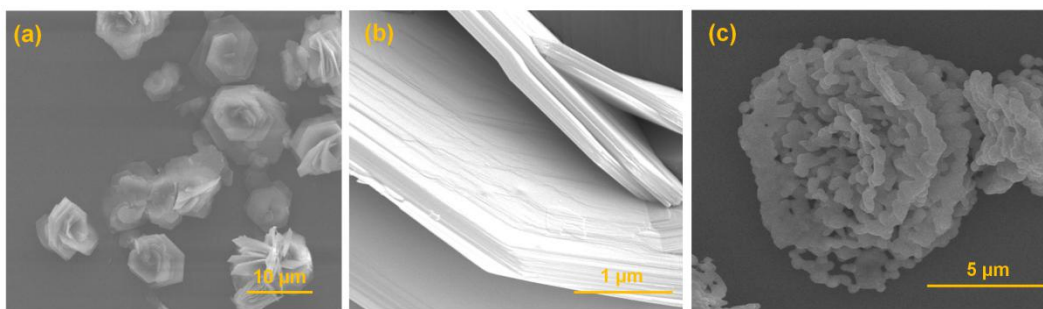

**Figure S3.** The SEM images of (a, b)  $\text{Co}(\text{PhPO}_3)$  and (c)  $\text{Co}_2\text{P}_2\text{O}_7\text{-900}$ .

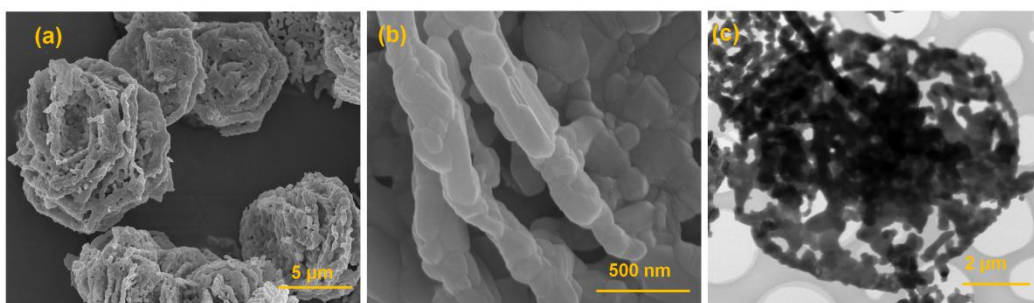

**Figure S4.** The SEM images (a, b) and TEM image (c) of  $\text{Co}_2\text{P}_2\text{O}_7/\text{C-900}$ .

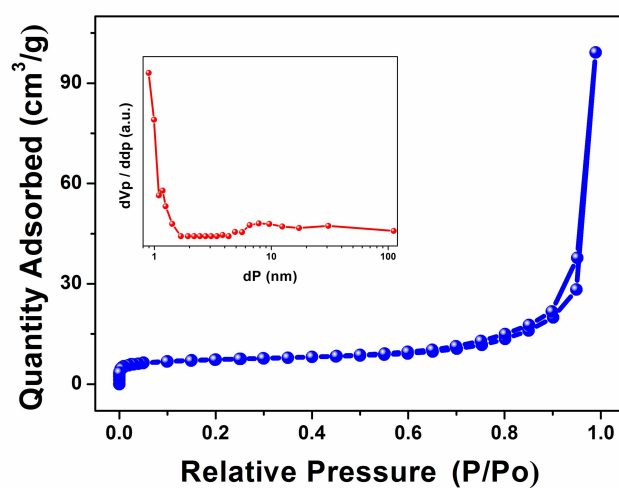

**Figure S5.** The  $\text{N}_2$  adsorption and desorption isotherms and pore size distribution curve of  $\text{Co}_2\text{P}_2\text{O}_7/\text{C-900}$ .

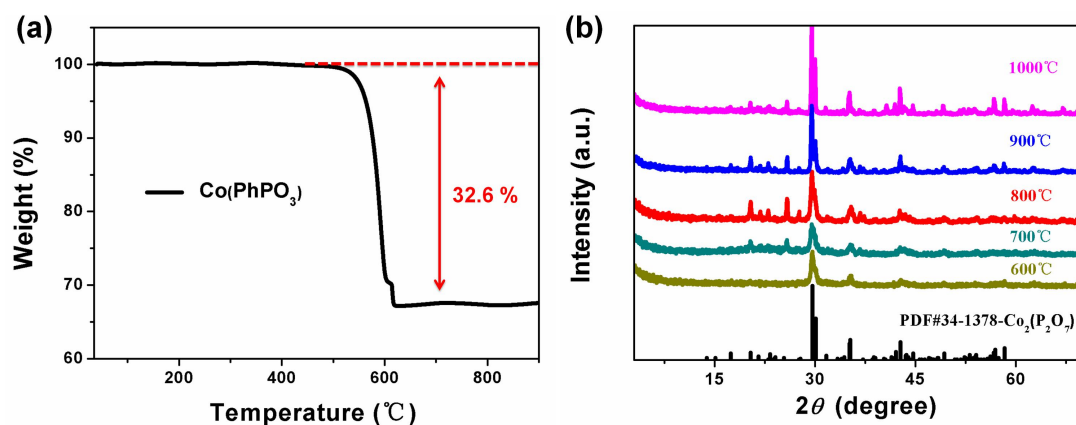

**Figure S6.** (a) The Thermogravimetric analysis of Co(PhPO<sub>3</sub>) precursor. (b) The PXRD patterns of Co<sub>2</sub>P<sub>2</sub>O<sub>7</sub>/C-600, Co<sub>2</sub>P<sub>2</sub>O<sub>7</sub>/C-700, Co<sub>2</sub>P<sub>2</sub>O<sub>7</sub>/C-800, Co<sub>2</sub>P<sub>2</sub>O<sub>7</sub>/C-900 and Co<sub>2</sub>P<sub>2</sub>O<sub>7</sub>/C-1000.

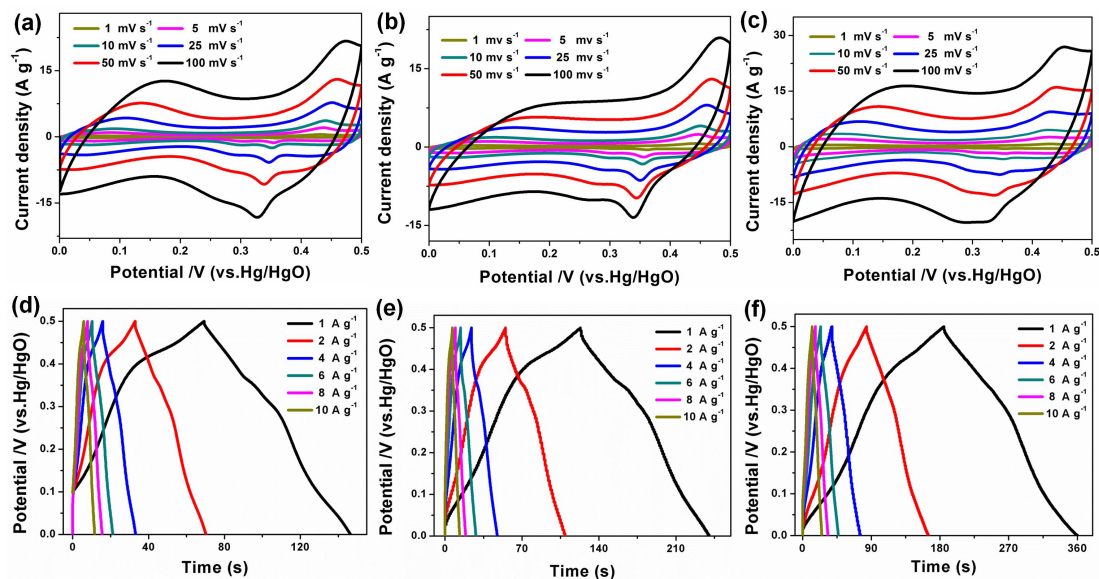

**Figure S7.** The CV curves (a), (b), (c) and GCD curves (d),(e), (f) of the Co(PhPO<sub>3</sub>), Co<sub>2</sub>P<sub>2</sub>O<sub>7</sub>-900 and Co<sub>2</sub>P<sub>2</sub>O<sub>7</sub>/C-900.

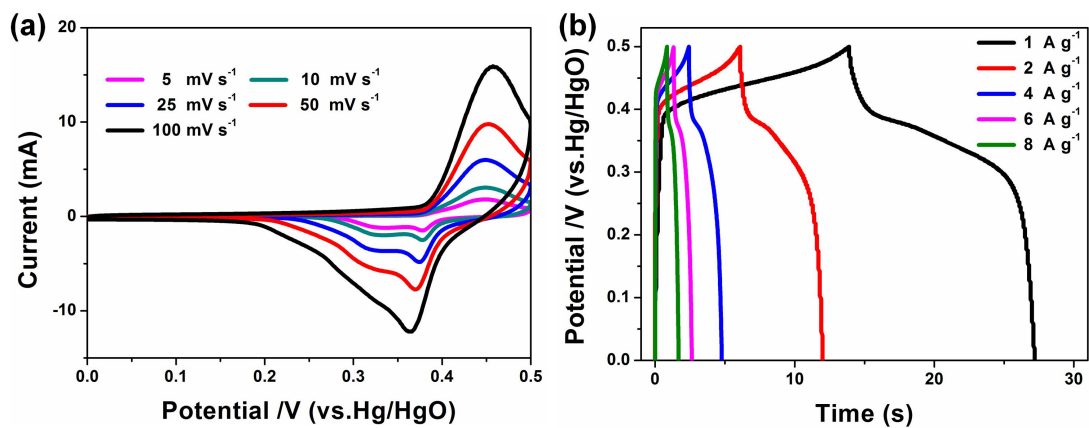

**Figure S8.** The electrochemical performance of Ni foam: (a) the CV curves (b) the GCD curves.

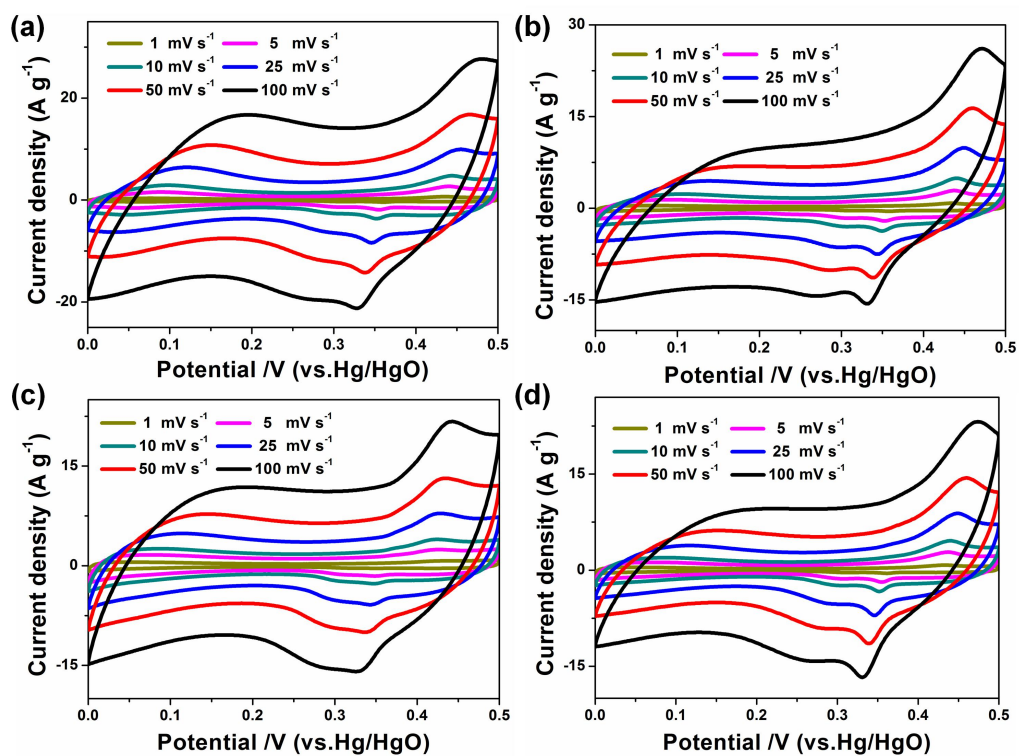

**Figure S9.** The CV curves of the Co<sub>2</sub>P<sub>2</sub>O<sub>7</sub>/C-600 (a), -700 (b), -800 (c) and -1000 (d) within the potential of 0-0.5 V (vs. Hg/HgO) at various scan rates.

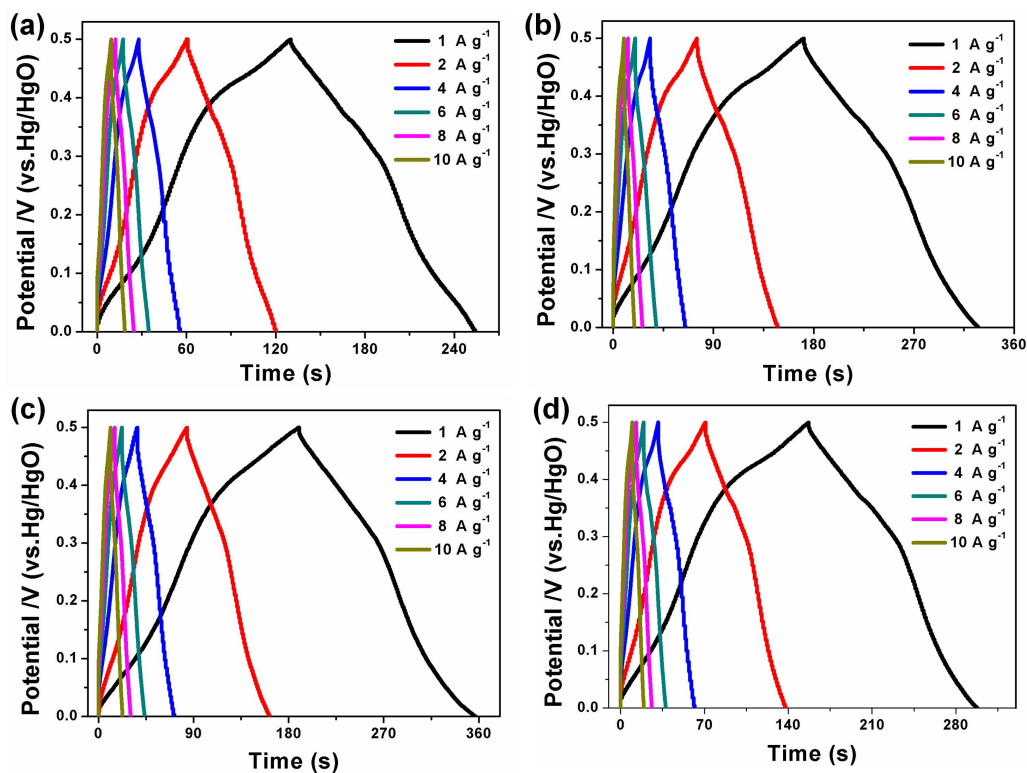

**Figure S10.** The GCD curves of the  $\text{Co}_2\text{P}_2\text{O}_7/\text{C}-600$  (a),  $-700$  (b),  $-800$  (c) and  $-1000$  (d) at various current densities.

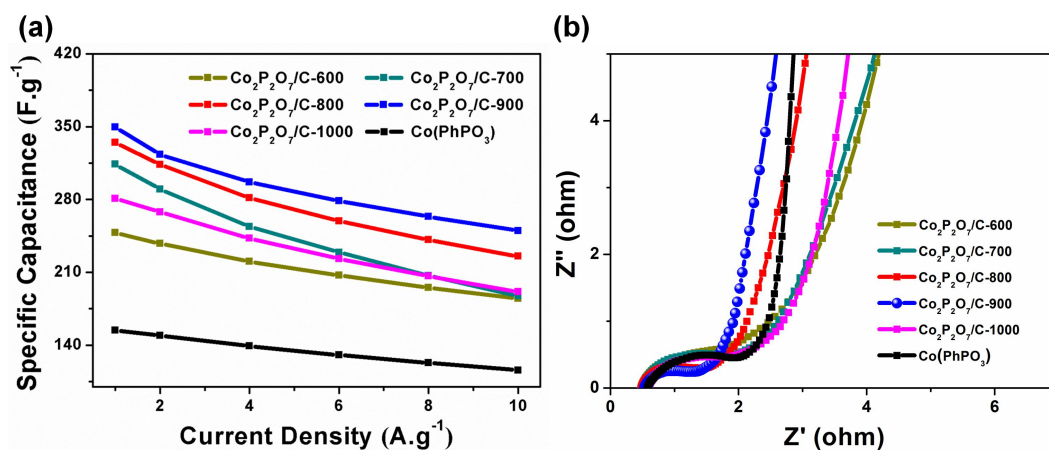

**Figure S11.** The specific capacitance (a) and the Nyquist plots (b) of  $\text{Co}_2\text{P}_2\text{O}_7/\text{C}-\text{X}$  and  $\text{Co}(\text{PhPO}_3)$ .

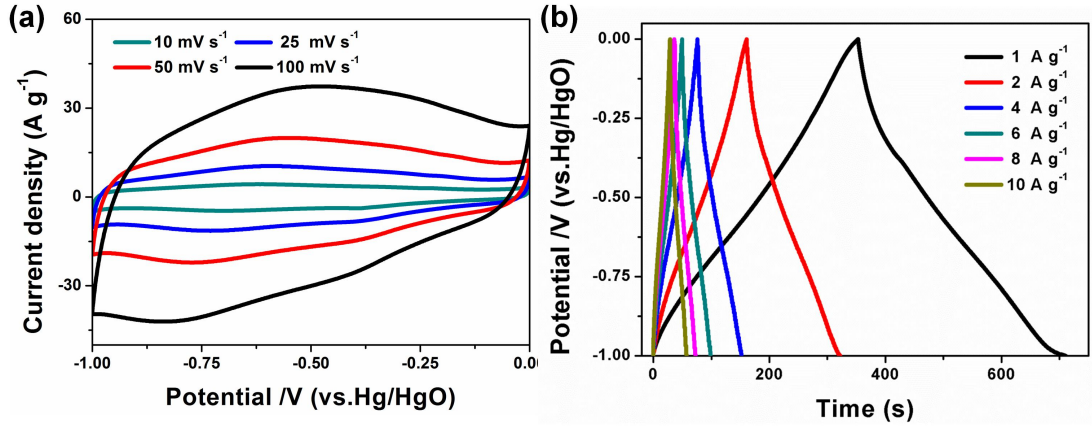

**Figure S12.** The CV (a) and GCD (b) curves of the 3DPG anode.

#### 4. Equation:

$$C = \frac{I\Delta t}{m\Delta V} \quad (S1)$$

Where  $C$  is the specific capacitance,  $I$  (A) is the discharge current,  $\Delta t$  (s) is the discharging time,  $m$  (g) is the mass of the active material, and  $\Delta V$  (V) is the potential range

$$i = k_1 v^{1/2} + k_2 v \quad (S2)$$

Where  $i$  and  $v$  stand for the peak current density and scan rate, respectively. Generally,  $k_1 v^{1/2}$  and  $k_2 v$  are associated with the bulk process contribution and the surface process contribution of the peak current density, respectively.

$$C^- \Delta V^- m^- = C^+ \Delta V^+ m^+ \quad (S3)$$

Where  $C^-$ ,  $\Delta V^-$  and  $m^-$  are the specific capacity, working potential range and mass of the 3DPG electrode material, respectively. The  $C^+$ ,  $\Delta V^+$  and  $m^+$  are the the specific capacity, working potential range and mass of the  $\text{Co}_2\text{P}_2\text{O}_7/\text{C-900}$  electrode material, respectively.

$$E = \frac{0.5 \times C \times \Delta V^2}{3.6} \quad (S4)$$

Where  $E$  is the energy density ( $\text{Wh kg}^{-1}$ ),  $C$  is the specific capacitance, and  $\Delta V$  (V) is the potential range .

$$P = \frac{E}{\Delta t} \quad (S5)$$

Where  $P$  is the powerty density ( $\text{kW kg}^{-1}$ ),  $E$  is the energy density ( $\text{Wh kg}^{-1}$ ),  $\Delta t$  (s) is the discharging time.

**Table S1.** Parameters of the proposed equivalent circuit model.

| Element Samples                                       | Rs<br>( $\Omega$ ) | Rct<br>( $\Omega$ ) | CPE-T<br>(F) | CPE-P | W-R<br>(Ohm) | W-T   | W-P   |
|-------------------------------------------------------|--------------------|---------------------|--------------|-------|--------------|-------|-------|
| Co <sub>2</sub> P <sub>2</sub> O <sub>7</sub> /C-600  | 0.485              | 0.879               | 0.019        | 0.704 | 2.495        | 1.193 | 0.458 |
| Co <sub>2</sub> P <sub>2</sub> O <sub>7</sub> /C-700  | 0.460              | 0.712               | 0.006        | 0.869 | 4.555        | 1.879 | 0.428 |
| Co <sub>2</sub> P <sub>2</sub> O <sub>7</sub> /C-800  | 0.466              | 0.687               | 0.006        | 0.834 | 2.728        | 1.426 | 0.438 |
| Co <sub>2</sub> P <sub>2</sub> O <sub>7</sub> /C-900  | 0.518              | 0.578               | 0.010        | 0.779 | 1.973        | 1.099 | 0.445 |
| Co <sub>2</sub> P <sub>2</sub> O <sub>7</sub> -900    | 0.440              | 0.738               | 0.010        | 0.816 | 8.332        | 2.858 | 0.451 |
| Co <sub>2</sub> P <sub>2</sub> O <sub>7</sub> /C-1000 | 0.569              | 0.940               | 0.008        | 0.797 | 4.331        | 1.974 | 0.453 |
| Co(PhPO <sub>3</sub> )                                | 0.566              | 1.062               | 0.013        | 0.750 | 2.353        | 0.691 | 0.469 |
